# Supplementary material for: HIV-1 neutralizing antibodies provide sterilizing immunity by blocking infection of the first cells
Source: PubMed Central journal article supplement — Cell Rep Med. 2023 Oct 6;4(10):101201. doi: 10.1016/j.xcrm.2023.101201 (PMC10591032; doi:10.1016/j.xcrm.2023.101201), 2023-10-06
Supplement: mmc1.pdf [file mmc1.pdf]

**Cell Reports Medicine, Volume 4**

**Supplemental information**

**HIV-1 neutralizing antibodies provide  
sterilizing immunity by blocking  
infection of the first cells**

**Viktoria Stab, Christiane Stahl-Hennig, Armin Ensser, Elie Richel, Kirsten Fraedrich, Ulrike Sauermann, Bettina Tippler, Florian Klein, Dennis R. Burton, Matthias Tenbusch, and Klaus Überla**

## Supplemental figures and tables

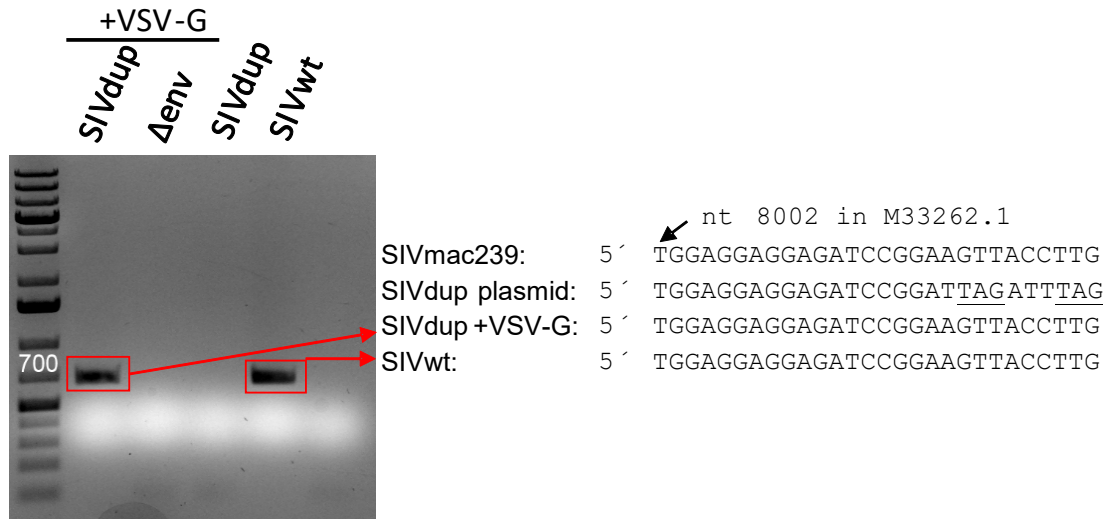

**Fig. S1. Repair of SIVdup. Related to Fig. 2.** RNA was extracted on day 7 from CEMxSEAP cells infected as described in Figure legend 2B. PCR amplicons with primers spanning the duplication site in *env* were separated by gel electrophoresis and bands marked in red were sequenced. The stop codons introduced into the *env* open reading frame of SIVdup are underlined.

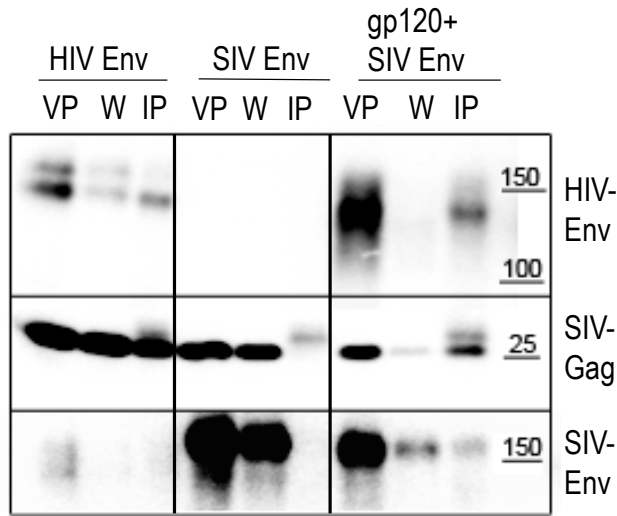

**Fig. S2. Incorporation of Env proteins into SIVdup virions. Related to Figure 6.**

Virion incorporation of HIV Env, SIV Env and gp120 was analysed by pelleting the whole cell culture supernatants of 293T cells cotransfected with SIVdup and the Env expression plasmids indicated through a 35% sucrose cushion. The pelleted virion preparations (VP) were analysed by Western blot with antibodies detecting the viral proteins indicated at the right of the figure. This revealed the presence of gp120, SIV-Gag and SIV-Env in pellets of gp120+SIV-Env pseudotyped SIVdup (Lane VP of gp120+SIV-Env panel). To test, whether PGT121 would bind to VPs of gp120+SIV-Env pseudotyped SIVdup, an aliquot of the same VP preparation analysed by Western blot was also immunoprecipitated by PGT121. The immunoprecipitates (IP) and the washing fraction (W) were then also analysed. The IP, but not the W fraction contained gp120. As expected from immunoprecipitation of entire particles by PGT121, the IP fraction also contained a clear SIV Gag band and a weak SIV Env band. Since immunoprecipitation of SIVdup particles pseudotyped with SIV Env only, did not reveal SIV Gag or SIV Env bands in the IP fraction (Lane IP of SIV Env panel), the SIV Gag and SIV Env bands detected in SIVdup pseudotyped with gp120+SIV Env cannot be due to cross-reaction of PGT121 with these antigens. The bands are rather explained by the coprecipitation of entire virions by PGT121.

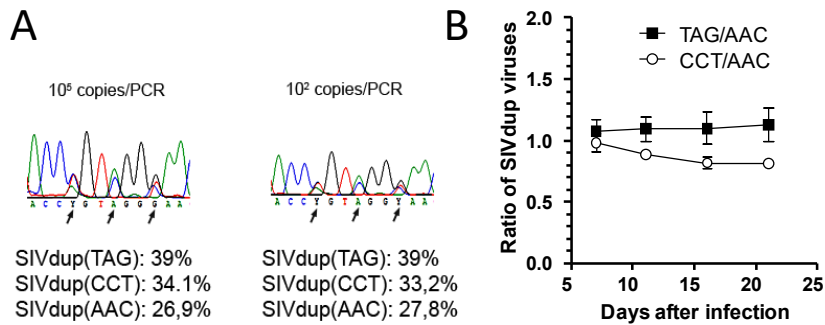

**Figure S3. Tagging of SIVdup. Related to Fig. 6.**

A) Sequence analysis of amplicons of an equimolar mix of SIVdup DNAs tagged at three consecutive wobble positions of *gag* (arrows) at the indicated template copy number. Percentage of reads of each tagged SIVdup as determined by NGS is shown. B) Replication efficiency of differentially tagged SIVdups. The three differentially tagged SIVdups were pseudotyped with HIV Env and titered on TZMbl cells. CEMxSEAP cells were co-infected in triplicates with 10<sup>4</sup> IUs of each of the three differentially tagged, HIV-Env pseudotyped SIVdups. Cultures were split and fed with fresh CEMxSEAP cells 4 hours after infection and on day 7, 11, and 16. Viral RNA was extracted from the supernatant of infected cultures on day 7, 11, 16 and 21. Amplicons spanning the tag were analysed by NGS and the number of reads of each tag in each sample was determined. The mean and standard deviations of the ratio of reads for the CCT tag and the TAG tag to the wild type AAC tag at the indicated time points are shown.

**Table S1. PGT121 serum concentrations. Related to Fig. 4 and 6**

| Days after injection | Low dose challenge (µg/ml) |                |      |      |      |      | Simultaneous challenge (µg/ml) |      |      |      |
|----------------------|----------------------------|----------------|------|------|------|------|--------------------------------|------|------|------|
|                      | 16115                      | 2701           | 2782 | 2882 | 2744 | 2816 | 2783                           | 2733 | 2752 | 2730 |
| 1                    | 4.8                        | 4.5            | 3.5  | 3.3  | 3.9  | n.a. | n.a.                           | n.a. | n.a. | n.a. |
| 8                    | 2.0                        | 1.7            | 0.9  | 1.6  | 1.2  | n.a. | 2.0                            | 1.1  | 1.5  | 1.2  |
| 70                   | n.a.                       | 0 <sup>1</sup> | 0    | n.a. | n.a. | 0    | n.a.                           | n.a. | n.a. | n.a. |

n.a.: sera for analysis not available; <sup>1</sup> detection limit: 0.09 µg/ml. Representative results of one out of three antibody measurements are shown.

**Supplemental Table 2. Number of reads. Related to Fig. 6.**

| Animals        | Tag (Env)           | Cut-off | Plasma | PBMCs | Lymph nodes |            |          |               |            |
|----------------|---------------------|---------|--------|-------|-------------|------------|----------|---------------|------------|
|                |                     |         |        |       | axillary 1  | axillary 2 | inguinal | submandibular | mesenteric |
| <b>Control</b> |                     |         |        |       |             |            |          |               |            |
| 2774           | AAC (HIV Env)       | 238     | 37680  | 43886 | 34228       | 41404      | 20266    | 33070         | 31705      |
|                | CCT (gp120+SIV Env) | 60      | 1250   | 2434  | 2001        | 2251       | 1112     | 2002          | 1770       |
|                | TAG (SIV Env)       | 926     | 872*   | 7837  | 6120        | 6898       | 3355     | 6443          | 5313       |
| 2712           | AAC (HIV Env)       | 212     | 34864  | 39094 | 40836       | 33332      | 51021    | 48140         | 46460      |
|                | CCT (gp120+SIV Env) | 36      | 1064   | 1573  | 1847        | 3275       | 2863     | 1750          | 1619       |
|                | TAG (SIV Env)       | 412     | 4331   | 4736  | 4865        | 8171       | 8136     | 5403          | 5896       |
| 2709           | AAC (HIV Env)       | 212     | 14606  | 35470 | 4387        | 17994      | 25013    | 29277         | 30048      |
|                | CCT (gp120+SIV Env) | 36      | 26     | 425   | 437         | 428        | 1530     | 761           | 157        |
|                | TAG (SIV Env)       | 412     | 220    | 1105  | 2434        | 956        | 2823     | 1343          | 438        |
| 16906          | AAC (HIV Env)       | 212     | 13686  | 20192 | 18555       | 14736      | 26676    | 31945         | 24125      |
|                | CCT (gp120+SIV Env) | 36      | 3444   | 6816  | 6636        | 4809       | 8751     | 16926         | 10909      |
|                | TAG (SIV Env)       | 412     | 937    | 1897  | 2624        | 2471       | 3712     | 1859          | 1237       |
| <b>PGT121</b>  |                     |         |        |       |             |            |          |               |            |
| 2783           | AAC (HIV Env)       | 238     | 5556   | 4852  | 3974        | 4270       | 3237     | 2838          | 3627       |
|                | CCT (gp120+SIV Env) | 60      | 6432   | 5553  | 3767        | 4525       | 3523     | 3336          | 3625       |
|                | TAG (SIV Env)       | 926     | 53234  | 40340 | 26147       | 34601      | 24013    | 20202         | 27604      |
| 2733           | AAC (HIV Env)       | 212     | 5013   | 2653  | 6238        | 316        | 4477     | 7737          | 9275       |
|                | CCT (gp120+SIV Env) | 36      | 277    | 252   | 558         | 10         | 546      | 685           | 954        |
|                | TAG (SIV Env)       | 412     | 16424  | 8557  | 25673       | 1026       | 15977    | 28426         | 25335      |
| 2752           | AAC (HIV Env)       | 212     | 2939   | 2994  | 4499        | 3464       | 2934     | 5152          | 7545       |
|                | CCT (gp120+SIV Env) | 36      | 2566   | 2864  | 5179        | 3854       | 2919     | 7572          | 6990       |
|                | TAG (SIV Env)       | 412     | 16037  | 15839 | 28138       | 23760      | 18478    | 34079         | 32163      |
| 2730           | AAC (HIV Env)       | 212     | 188    | 97    | 5593        | 88         | 215      | 186           | 205        |
|                | CCT (gp120+SIV Env) | 36      | 412    | 513   | 992         | 84         | 290      | 433           | 291        |
|                | TAG (SIV Env)       | 412     | 38023  | 41490 | 29738       | 18129      | 43646    | 42723         | 33305      |

\* shaded numbers are below cut-off

**Supplemental Table 3. Ratio of reads. Related to Fig. 6.**

| Animals        | Ratio of viruses      | Plasma | PBMCs | Lymph nodes |            |          |               |            | Median |
|----------------|-----------------------|--------|-------|-------------|------------|----------|---------------|------------|--------|
|                |                       |        |       | axillary 1  | axillary 2 | inguinal | submandibular | mesenteric |        |
| <b>Control</b> |                       |        |       |             |            |          |               |            |        |
| 2774           | HIV Env/SIV Env       | n.a.   | 5,60  | 5,59        | 6,00       | 6,04     | 5,13          | 5,97       | 5,78   |
|                | gp120+SIV Env/SIV Env | n.a.   | 0,31  | 0,33        | 0,33       | 0,33     | 0,31          | 0,33       | 0,33   |
| 2712           | HIV Env/SIV Env       | 8,05   | 8,25  | 8,39        | 4,08       | 6,27     | 8,91          | 7,88       | 8,05   |
|                | gp120+SIV Env/SIV Env | 0,25   | 0,33  | 0,38        | 0,40       | 0,35     | 0,32          | 0,27       | 0,33   |
| 2709           | HIV Env/SIV Env       | n.a.   | 32,10 | 1,80        | 18,82      | 8,86     | 21,80         | 68,60      | 20,31  |
|                | gp120+SIV Env/SIV Env | n.a.   | 0,38  | 0,18        | 0,45       | 0,54     | 0,57          | 0,36       | 0,42   |
| 16906          | HIV Env/SIV Env       | 14,61  | 10,64 | 7,07        | 5,96       | 7,19     | 17,18         | 19,50      | 10,64  |
|                | gp120+SIV Env/SIV Env | 3,68   | 3,59  | 2,53        | 1,95       | 2,36     | 9,10          | 8,82       | 3,59   |
| <b>PGT121</b>  |                       |        |       |             |            |          |               |            |        |
| 2783           | HIV Env/SIV Env       | 0,10   | 0,12  | 0,15        | 0,12       | 0,13     | 0,14          | 0,13       | 0,13   |
|                | gp120+SIV Env/SIV Env | 0,12   | 0,14  | 0,14        | 0,13       | 0,15     | 0,17          | 0,13       | 0,14   |
| 2733           | HIV Env/SIV Env       | 0,31   | 0,31  | 0,24        | 0,31       | 0,28     | 0,27          | 0,37       | 0,31   |
|                | gp120+SIV Env/SIV Env | 0,02   | 0,03  | 0,02        | n.a.       | 0,03     | 0,02          | 0,04       | 0,03   |
| 2752           | HIV Env/SIV Env       | 0,18   | 0,19  | 0,16        | 0,15       | 0,16     | 0,15          | 0,23       | 0,16   |
|                | gp120+SIV Env/SIV Env | 0,16   | 0,18  | 0,18        | 0,16       | 0,16     | 0,22          | 0,22       | 0,18   |
| 2730           | HIV Env/SIV Env       | n.a.   | n.a.  | 0,19        | n.a.       | 0,005    | n.a.          | n.a.       | 0,10   |
|                | gp120+SIV Env/SIV Env | 0,011  | 0,012 | 0,033       | 0,005      | 0,007    | 0,010         | 0,009      | 0,01   |

n.a.: not applicable since one value below threshold
